# Supplementary material
Source: ML conference proceedings conference paper supplement (https://proceedings.neurips.cc/paper_files/paper/2022/hash/1ba5f64159d67775a251cf9ce386a2b9-Abstract.html)
Supplement: Supplementary file 1 [file 1ba5f64159d67775a251cf9ce386a2b9-Supplemental-Conference.zip]

Archive with 3 entries (2 files):
- your_transformer_may_not_be_as-Supplementary Material/Appendix/
- your_transformer_may_not_be_as-Supplementary Material/Appendix/1737_your_transformer_may_not_be_as.pdf
- your_transformer_may_not_be_as-Supplementary Material/README.md
