# Supplementary material
Source: ML conference proceedings conference paper supplement (https://proceedings.neurips.cc/paper_files/paper/2022/hash/1ba5f64159d67775a251cf9ce386a2b9-Abstract.html)
Supplement: Supplementary file 1 [file 1ba5f64159d67775a251cf9ce386a2b9-Supplemental-Conference.zip › your_transformer_may_not_be_as-Supplementary Material/README.md]

## Supplementary Materials for Paper1737 Submission

In this folder, we provid supplementary materials for paper 1737 submission of NeurIPS 2022. The Appendix folder contains the full version of our paper. The code folder contains the codes for our experiments. Please refer to the README.md file in the code folder to run the experiments.

Also see https://github.com/lsj2408/URPE
